# Supplementary material for: Amino acids, carbohydrates, and lipids in the tropical oligotrophic Atlantic Ocean: sea-to-air transfer and atmospheric in situ formation
Source: Copernicus journal article supplement (doi:10.5194/acp-23-6571-2023), 2023-06-15
Supplement: Supplementary file 1 [file acp-23-6571-2023-supplement.pdf]

*Supplement of*

## **Amino acids, carbohydrates, and lipids in the tropical oligotrophic Atlantic Ocean: sea-to-air transfer and atmospheric in situ formation**

**Manuela van Pinxteren et al.**

*Correspondence to:* Hartmut Herrmann ([herrmann@tropos.de](mailto:herrmann@tropos.de))

The copyright of individual parts of the supplement might differ from the article licence.



30

31 Figure S1: Sampling stations of the MarParCloud: Cape Verde Atmospheric Observatory  
 32 (CVAO) and seawater sampling site (adopted from Triesch et al. 2021b)

33

34

35

36

37

38

39

40

41

42



43

44 Figure S2: 96 hour back trajectories calculated on an hourly basis within the intervals of the  
 45 aerosol particle filter sampling at the CVAO for selected time periods, using the NOAA HYSPLIT  
 46 model (HYbrid Single-Particle Lagrangian Integrated Trajectory,  
 47 <http://www.arl.noaa.gov/ready/hysplit4.html>, 26.07.19) in the ensemble mode at an arrival  
 48 height of  $500 \text{ m} \pm 200 \text{ m}$  (van Pinxteren et al., 2010), adopted from van Pinxteren et al. (2020).  
 49 The meteorological conditions observed during the campaign were typical for this site with  
 50 strong north-easterly wind ( $30$  to  $60^\circ$ ) and are reported in van Pinxteren et al. (2020).

51

52

53

54

55

56

57

58

59

60

61

62

63

64

65

66 Tab. S1: Overview of the sampling details. The MarParCloud campaign took place from 13  
 67 September 2017 – 13 October 2017 and details are given in van Pinxteren et al. (2020).  
 68 Selected samples from the campaign were analysed for the OC groups. Further details are  
 69 given in van Pinxteren et al. (2020), and (Triesch et al., 2021a;Triesch et al., 2021b).

| Type of sample                                                                                         | Sampling location                                                               | Types of samples                                        | Type of analysis / number of samples                                                                                        | Sample treatment and analysis                                                                                                                                                                                                                                                                                                                                                                                                                                                      |
|--------------------------------------------------------------------------------------------------------|---------------------------------------------------------------------------------|---------------------------------------------------------|-----------------------------------------------------------------------------------------------------------------------------|------------------------------------------------------------------------------------------------------------------------------------------------------------------------------------------------------------------------------------------------------------------------------------------------------------------------------------------------------------------------------------------------------------------------------------------------------------------------------------|
| SML<br>               | Bahia das Gatas:<br>16°53'17'N,<br>24°54'25'E                                   | Water samples, Spot samples                             | DL: n = 6<br>DAA: n = 6<br>DCHO: n = 3                                                                                      | DL: extract in dichloromethane, filtration (GF-F); analysis: TLC-FID <sup>*1</sup><br>DAA, DCHO: desalination, filtration (0.2 µm), hydrolysis; analysis: UHPLC/ESI-Orbitrap-MS <sup>*2</sup> (DAA), HPAEC-PAD <sup>*3</sup> (DCHO)                                                                                                                                                                                                                                                |
| Bulk water<br>      | Bahia das Gatas:<br>16°53'17'N,<br>24°54'25'E                                   | Water samples, Spot samples                             | DL: n = 13<br>DAA: n = 3<br>DCHO: n = 3                                                                                     | DL: extract in dichloromethane, filtration (GF-F); analysis: TLC-FID <sup>*1</sup><br>DAA, DCHO: desalination, filtration (0.2 µm), hydrolysis; analysis: UHPLC/ESI-Orbitrap-MS <sup>*2</sup> (DAA), HPAEC-PAD <sup>*3</sup> (DCHO)                                                                                                                                                                                                                                                |
| PM <sub>1</sub><br> | CVAO:<br>16°51'49'N,<br>24°52'02'E<br>sampler installed on a tower: 30 m height | Quartz fiber filters samples, comprise a 24 h intervall | DL: n = 14<br>AA <sub>aer</sub> : n = 7<br>CHO <sub>aer</sub> : n = 8<br>Na <sup>+</sup> : n = 14<br>OC: n = 8<br>EC: n = 8 | Lipids <sub>aer</sub> : extract in dichloromethane, filtration (GF-F); analysis: TLC-FID <sup>*1</sup><br>AA <sub>aer</sub> , CHO <sub>aer</sub> : aqueous extract, filtration (0.2 µm), hydrolysis; analysis: UHPLC/ESI-Orbitrap-MS <sup>*2</sup> (AA <sub>aer</sub> ), HPAEC-PAD <sup>*3</sup> (CHO <sub>ae</sub> )<br>OC/EC: filter piece directly measured; analysis: Sunset Analyzer<br>Na <sup>+</sup> : aqueous extract, filtration (0.45 µm); analysis: ion chromatography |

70 \*<sup>1</sup> Thin-layer chromatography -flame ionisation detector, \*<sup>2</sup> Ultra-high performance liquid chromatography  
 71 with electrospray ionization and Orbitrap mass spectrometry (UHPLC/ESI-Orbitrap-MS), \*<sup>3</sup> High-Performance  
 72 Anion-Exchange Chromatography coupled with Pulsed Amperometric Detection

73

74 Table S2: Concentration of individual monosaccharides, after hydrolysis step, ( $\mu\text{g L}^{-1}$ ) in the  
 75 SML and bulk water samples. For the calculation of the  $EF_{SML}$  ( $EF_{SML} = c_{SML} / c_{bulkwater}$ ) the  
 76 SML sample was related to the bulk water sample from the same day.

| Sample ID  | Sampling date | Fuc  | GalN | Rha | Ara | GlcN | Gal  | Glc  | Xyl+Man | MurAc | GalAc | GlcAc |
|------------|---------------|------|------|-----|-----|------|------|------|---------|-------|-------|-------|
| SML 7      | 27.09.2017    | 9.9  | 3.9  | 8.7 | 7.6 | 5.2  | 18.1 | 35.0 | 10.3    | 2.1   | 7.2   | 1.0   |
| SML 7 (2)  | 27.09.2017    | 10.5 | 4.4  | 9.1 | 7.5 | 5.2  | 19.2 | 30.6 | 9.4     | 2.4   | 7.4   | 1.0   |
| SML 10     | 03.10.2017    | 8.2  | 3.0  | 6.7 | 6.9 | 4.2  | 17.5 | 17.6 | 10.0    | 2.1   | 8.3   | 1.9   |
| SML 10 (2) | 03.10.2017    | 9.1  | 3.5  | 7.4 | 7.5 | 4.8  | 18.6 | 23.5 | 10.5    | 2.5   | 7.3   | 3.3   |
| SML 14     | 07.10.2017    | 5.3  | 2.1  | 5.0 | 4.0 | 2.6  | 8.8  | 14.3 | 4.9     | 3.2   | 1.7   | 1.5   |
| SML 14 (2) | 07.10.2017    | 6.1  | 2.4  | 5.0 | 4.1 | 2.6  | 8.4  | 13.0 | 4.6     | 3.9   | 1.8   | 1.9   |
| ULW 7      | 27.09.2017    | 4.6  | 1.6  | 4.1 | 3.8 | 2.4  | 9.0  | 24.9 | 5.4     | 1.0   | 8.9   | 2.7   |
| ULW 7 (2)  | 27.09.2017    | 4.6  | 1.4  | 4.3 | 3.6 | 2.3  | 8.7  | 30.1 | 4.5     | 1.0   | 7.3   | 1.8   |
| ULW 10     | 03.10.2017    | 7.2  | 2.8  | 7.1 | 5.8 | 3.5  | 14.3 | 16.0 | 4.8     | 1.0   | 7.5   | 4.2   |
| ULW 10 (2) | 03.10.2017    | 6.9  | 3.0  | 7.5 | 6.5 | 3.8  | 13.9 | 13.9 | 5.3     | 1.0   | 8.2   | 0.4   |
| ULW 14     | 07.10.2017    | 7.9  | 3.0  | 7.3 | 7.7 | 3.9  | 14.4 | 30.5 | 7.3     | 2.0   | 6.9   | 3.5   |
| ULW 14 (2) | 07.10.2017    | 7.5  | 3.4  | 8.1 | 6.7 | 4.5  | 13.1 | 28.2 | 7.4     | 1.8   | 5.5   | 3.9   |

77

78 Table S3: Concentration of individual amino acids, after hydrolysis step, ( $\mu\text{g L}^{-1}$ ) in the SML  
 79 and bulk water samples. For the calculation of the  $EF_{SML}$  ( $EF_{SML} = c_{SML} / c_{bulkwater}$ ) two groups  
 80 were constructed. The sum of amino acids from SML 16 and ULW 16 were related to each  
 81 other (group 1), all other SML values were summed up and averaged and divided by all other  
 82 (summed up and averaged) bulk water values. The final EF SML was calculated as the  
 83 average between these two values.

| Sample ID | Sampling date | Gly  | Ala  | Ser  | Glu | Thr  | Pro  | Tyr | Val  | Phe | Asp  | Iso | Leu  |
|-----------|---------------|------|------|------|-----|------|------|-----|------|-----|------|-----|------|
| SML 8     | 28.09.2017    | 50.8 | 39.9 | 70.4 | 0.2 | 17.1 | 12.2 | 2.9 | 15.6 | 2.2 | 19.3 | 7.5 | 11.1 |
| SML 10    | 03.10.2017    | 22.6 | 7.4  | 16.3 | 0.2 | 1.3  | 2.5  | 0.1 | 2.5  | 0.4 | 0.2  | 0.3 | 0.9  |
| ULW 11    | 04.10.2017    | 5.7  | 0.2  | 0.2  | 0.2 | 38.2 | 0.2  | 0.1 | 25.8 | 4.0 | 38.3 | 0.2 | 0.2  |
| ULW 12    | 05.10.2017    | 33.6 | 12.9 | 38.9 | 0.2 | 4.7  | 3.5  | 0.1 | 5.1  | 1.0 | 3.9  | 0.2 | 3.7  |
| SML 13    | 06.10.2017    | 24.3 | 0.2  | 0.2  | 0.2 | 0.2  | 0.2  | 0.1 | 0.2  | 0.2 | 0.2  | 0.2 | 0.1  |
| SML 14    | 07.10.2017    | 38.1 | 14.1 | 30.0 | 0.2 | 3.1  | 3.9  | 0.1 | 5.6  | 1.7 | 9.1  | 1.9 | 9.9  |

|        |            |       |      |       |      |      |      |     |      |     |      |     |      |
|--------|------------|-------|------|-------|------|------|------|-----|------|-----|------|-----|------|
| SML 16 | 10.10.2017 | 36.5  | 1.2  | 5.0   | 0.2  | 0.8  | 1.5  | 0.1 | 2.4  | 0.2 | 0.2  | 0.2 | 0.2  |
| ULW 16 | 10.10.2017 | 17.4  | 0.2  | 0.2   | 0.2  | 0.2  | 0.2  | 0.1 | 0.2  | 0.2 | 0.2  | 0.2 | 0.2  |
| SML 3  | 20.09.2017 | 163.2 | 93.4 | 156.9 | 54.9 | 28.1 | 25.4 | 0.7 | 28.5 | 5.4 | 54.9 | 9.7 | 25.7 |

84

85 Table S4: Concentration of individual monosaccharides, after hydrolysis step, ( $\text{pg m}^{-3}$ ) in the  
86  $\text{PM}_1$  (detection limit =  $5 \text{ pg m}^{-3}$ ).

| Sample ID | Start sampling (UTC) | Stop sampling (UTC) | Fuc | GalN | Rha | Ara | GlcN | Gal | Glc | Xyl+Man | MurAc | GalAc | GlcAc |
|-----------|----------------------|---------------------|-----|------|-----|-----|------|-----|-----|---------|-------|-------|-------|
| PM1 924   | 19.09.2017 20:00     | 20.09.2017 20:00    | 44  | 21   | 5   | 113 | 5    | 112 | 422 | 95      | 187   | 193   | 5     |
| PM1 926   | 22.09.2017 15:00     | 23.09.2017 15:00    | 22  | 13   | 5   | 5   | 5    | 28  | 128 | 138     | 5     | 103   | 5     |
| PM1 927   | 23.09.2017 15:00     | 24.09.2017 15:00    | 27  | 5    | 5   | 5   | 5    | 66  | 917 | 18      | 5     | 454   | 5     |
| PM1 928   | 24.09.2017 15:00     | 25.09.2017 15:00    | 49  | 31   | 5   | 345 | 504  | 107 | 553 | 82      | 5     | 1147  | 5     |
| PM1 934   | 30.09.2017 15:00     | 01.10.2017 15:00    | 27  | 5    | 5   | 5   | 32   | 35  | 5   | 18      | 5     | 84    | 5     |
| PM1 937   | 02.10.2017 15:00     | 03.10.2017 15:00    | 5   | 5    | 5   | 54  | 5    | 131 | 141 | 71      | 112   | 66    | 5     |
| PM1 945   | 08.10.2017 15:00     | 09.10.2017 15:00    | 5   | 5    | 5   | 5   | 5    | 5   | 50  | 5       | 5     | 5     | 5     |
| PM1 946   | 09.10.2017 15:00     | 10.10.2017 15:00    | 22  | 5    | 5   | 5   | 5    | 5   | 77  | 45      | 5     | 5     | 5     |

87

88

89

90 Table S5: Concentration of individual amino acids, after hydrolysis step, ( $\text{pg m}^{-3}$ ) in the  $\text{PM}_1$   
91 (detection limit =  $2 \text{ pg m}^{-3}$ ).

| Sample ID | Start sampling (UTC) | Stop sampling (UTC) | Gly  | Ala | Ser  | Glu | Thr | Pro | Tyr | Val | Phe  | Asp | Iso | Leu  |
|-----------|----------------------|---------------------|------|-----|------|-----|-----|-----|-----|-----|------|-----|-----|------|
| PM1 920   | 15.09.2017 15:00     | 16.09.2017 15:00    | 1208 | 794 | 136  | 236 | 562 | 118 | 144 | 51  | 5    | 32  | 30  | 1208 |
| PM1 923   | 18.09.2017 20:00     | 19.09.2017 20:00    | 318  | 528 | 7    | 84  | 148 | 58  | 46  | 3   | 1143 | 6   | 4   | 318  |
| PM1 927   | 23.09.2017 15:00     | 24.09.2017 15:00    | 571  | 811 | 1039 | 302 | 462 | 420 | 325 | 45  | 5    | 61  | 172 | 571  |
| PM1 930   | 26.09.2017 15:00     | 27.09.2017 15:00    | 82   | 387 | 5    | 24  | 45  | 7   | 17  | 5   | 388  | 5   | 5   | 82   |
| PM1 932   | 28.09.2017 15:00     | 29.09.2017 15:00    | 668  | 604 | 108  | 149 | 204 | 119 | 111 | 37  | 5    | 22  | 29  | 668  |
| PM1 940   | 05.10.2017 15:00     | 06.10.2017 15:00    | 124  | 458 | 199  | 45  | 128 | 69  | 70  | 12  | 5    | 20  | 38  | 124  |
| PM1 942   | 07.10.2017 15:00     | 08.10.2017 15:00    | 275  | 805 | 5    | 38  | 170 | 26  | 3   | -   | 1168 | 5   | 5   | 275  |

92

93

94

95 Table S6: Relative composition (mol%) of the individual compounds in the bulk water, the SML and  
 96 the aerosol particles. *Italic values correspond to half the detection limit. Classification of the lipids*  
 97 *after (Parrish, 1988;Parrish and Wells, 2021).*

|               | bulk water  | SML   | aerosol | classification            |
|---------------|-------------|-------|---------|---------------------------|
| amino acids   |             |       |         |                           |
| Phe           | 2.15        | 0.88  | 0.66    | neutral/polar             |
| Gly           | 23.68       | 29.37 | 35.33   | neutral/polar             |
| Ser           | 16.39       | 24.42 | 18.68   | neutral/polar             |
| Tyr           | <i>0.14</i> | 0.36  | 0.23    | neutral/polar             |
| Thr           | 17.94       | 4.43  | 4.45    | neutral/non-polar         |
| Ala           | 5.56        | 13.67 | 11.67   | neutral/non-polar         |
| Pro           | 1.59        | 3.98  | 4.79    | neutral/non-polar         |
| Val           | 12.87       | 4.77  | 3.70    | neutral/non-polar         |
| Leu           | 1.65        | 4.19  | 1.33    | neutral/non-polar         |
| Iso           | <i>0.19</i> | 1.73  | 0.63    | neutral/non-polar         |
| Asp           | 17.66       | 7.33  | 12.35   | acidic                    |
| Glu           | <i>0.19</i> | 4.87  | 6.16    | acidic                    |
|               |             |       |         |                           |
| carbohydrates |             |       |         |                           |
| GlcN          | 4.29        | 4.77  | 7.99    | basic                     |
| GalN          | 3.23        | 3.76  | 1.84    | basic                     |
| Fuc           | 8.88        | 10.46 | 3.08    | neutral                   |
| Rha           | 8.82        | 8.91  | 1.76    | neutral                   |
| Ara           | 8.56        | 8.73  | 8.75    | neutral                   |
| Gal           | 15.39       | 17.56 | 6.04    | neutral                   |
| Glc           | 30.07       | 25.96 | 28.98   | neutral                   |
| Xyl+Man       | 7.24        | 9.63  | 5.52    | neutral                   |
| MurAc         | 1.73        | 2.25  | 19.03   | acidic (bacterial tracer) |
| GalAc         | 8.59        | 6.06  | 7.15    | acidic                    |
| GlcAc         | 3.21        | 1.91  | 9.87    | acidic                    |
|               |             |       |         |                           |
| lipids        |             |       |         |                           |
| HC            | 44.07       | 30.89 | 39.00   | hydrocarbon               |
| ST            | 0.28        | 0.53  | 0.94    | sterol                    |
| PIG           | 2.09        | 1.28  | 0.50    | pigments                  |
| ME            | 0.36        | 1.34  | no data | methyl ester              |
| WE            | 0.61        | 0.80  | no data | membrane component        |
| TG            | 0.91        | 1.17  | 8.03    | metabolic reserve         |
| FFA           | 13.65       | 17.32 | 21.27   | degradation lipids        |
| ALC           | 1.22        | 2.26  | 8.49    | degradation lipids        |
| 1,3DG         | no data     | 0.29  | 0.17    | degradation lipids        |
| 1,2 DG        | 0.07        | 0.42  | 0.46    | degradation lipids        |
| MG            | 0.19        | 0.19  | 0.43    | degradation lipids        |

|      |       |       |         |              |
|------|-------|-------|---------|--------------|
| MGDG | 16.77 | 18.44 | 3.42    | glycolipids  |
| DGDG | 0.35  | 3.49  | 2.84    | glycolipids  |
| SQDG | 2.11  | 2.01  | 5.55    | glycolipids  |
| PE   | 6.17  | 8.40  | 4.74    | polar lipids |
| PG   | 11.12 | 11.04 | 4.17    | polar lipids |
| PC   | 0.03  | 0.15  | no data | polar lipids |

98

99

100 Table S7: Concentration of organic carbon (OC) and elemental carbon (EC) in  $\mu\text{g m}^{-3}$  in the  
101 PM<sub>1</sub>.

| Sample ID | Start sampling (UTC) | Stop sampling (UTC) | OC    | EC    |
|-----------|----------------------|---------------------|-------|-------|
| PM1 922   | 17.09.2017 20:00     | 18.09.2017 20:00    | 0.310 | 0.127 |
| PM1 923   | 18.09.2017 20:00     | 19.09.2017 20:00    | 0.274 | 0.131 |
| PM1 924   | 19.09.2017 20:00     | 20.09.2017 20:00    | 0.201 | 0.136 |
| PM1 927   | 23.09.2017 15:00     | 24.09.2017 15:00    | 0.169 | 0.053 |
| PM1 929   | 25.09.2017 15:00     | 26.09.2017 15:00    | 0.202 | 0.115 |
| PM1 932   | 28.09.2017 15:00     | 29.09.2017 15:00    | 0.130 | 0.091 |
| PM1 933   | 30.09.2017 15:00     | 29.09.2017 15:00    | 0.13  | 0.054 |
| PM1 934   | 30.09.2017 15:00     | 01.10.2017 15:00    | 0.150 | 0.069 |

102

103

Tab. S8: Average concentration and respective carbon contribution of the OC groups

| OC group      | ng m <sup>-3</sup> | ng C m <sup>-3</sup> | % OC  | Reference               |
|---------------|--------------------|----------------------|-------|-------------------------|
| carbohydrates |                    |                      |       |                         |
| DCHO          | 1.5                | 0.6                  | 0.30  | this work               |
| amino acids   |                    |                      |       |                         |
| DAA           | 2.4                | 0.8                  | 0.41  | this work               |
| lipids (DL)   |                    |                      |       |                         |
| HC            | 32.1               | 27.25                | 13.56 | (Triesch et al., 2021b) |
| TG            | 21.9               | 16.83                | 8.38  | (Triesch et al., 2021b) |
| FFA           | 18.5               | 14.08                | 7.00  | (Triesch et al., 2021b) |
| ALC           | 6.3                | 5.00                 | 2.49  | (Triesch et al., 2021b) |
| 1,3DG         | 0.2                | 0.19                 | 0.09  | (Triesch et al., 2021b) |
| ST            | 2.6                | 1.74                 | 0.87  | (Triesch et al., 2021b) |
| 1,2DG         | 0.5                | 0.41                 | 0.20  | (Triesch et al., 2021b) |
| PIG           | 0.9                | 0.55                 | 0.27  | (Triesch et al., 2021b) |
| MG            | 0.8                | 0.61                 | 0.30  | (Triesch et al., 2021b) |
| MGDG          | 3.4                | 1.51                 | 0.75  | (Triesch et al., 2021b) |
| DGDG          | 4.0                | 1.88                 | 0.94  | (Triesch et al., 2021b) |
| SQDG          | 14.2               | 8.77                 | 4.36  | (Triesch et al., 2021b) |
| PG            | 3.8                | 1.38                 | 0.69  | (Triesch et al., 2021b) |

|              |      |      |      |                              |
|--------------|------|------|------|------------------------------|
| PE           | 10.5 | 6.62 | 3.29 | (Triesch et al., 2021b)      |
| others       |      |      |      |                              |
| oxalic acid* | 2.0  | 0.55 | 0.27 | (van Pinxteren et al., 2015) |
| amine        | 17.0 | 8.84 | 4.40 | (van Pinxteren et al., 2015) |
| MSA          | 14.0 | 1.76 | 0.88 | (van Pinxteren et al., 2015) |
| carbonyls    | 0.1  | 0.02 | 0.01 | (van Pinxteren et al., 2015) |

104 \*Oxalic acid was the dominant dicarboxylic acid and all other dicarboxylic acids were below LOD.

105

106 References:

107

108 Parrish, C. C.: Dissolved and particulate marine lipid classes - a review, *Marine Chemistry*, 23,  
109 17-40, 10.1016/0304-4203(88)90020-5, 1988.

110 Parrish, C. C., and Wells, J. S.: Determination of Total Lipid and Lipid Classes in Marine Samples,  
111 *Jove-Journal of Visualized Experiments*, 10.3791/62315, 2021.

112 Triesch, N., van Pinxteren, M., Engel, A., and Herrmann, H.: Concerted measurements of free  
113 amino acids at the Cape Verde Islands: High enrichments in submicron sea spray aerosol particles  
114 and cloud droplets, *Atmos. Chem. Phys.*, 21, 163–181, 2021a.

115 Triesch, N., van Pinxteren, M., Frka, S., Stolle, C., Spranger, T., Hoffmann, E. H., Gong, X., Wex,  
116 H., Schulz-Bull, D., Gašparović, B., and Herrmann, H.: Concerted measurements of lipids in seawater  
117 and on submicrometer aerosol particles at the Cabo Verde islands: biogenic sources, selective  
118 transfer and high enrichments, *Atmos. Chem. Phys.*, 21, 4267-4283, 10.5194/acp-21-4267-2021,  
119 2021b.

120 van Pinxteren, D., Brüeggemann, E., Gnauk, T., Mueller, K., Thiel, C., and Herrmann, H.: A GIS  
121 based approach to back trajectory analysis for the source apportionment of aerosol constituents and  
122 its first application, *Journal of Atmospheric Chemistry*, 67, 1-28, 10.1007/s10874-011-9199-9, 2010.

123 van Pinxteren, M., Fiedler, B., van Pinxteren, D., Iinuma, Y., Koertzinger, A., and Herrmann, H.:  
124 Chemical characterization of sub-micrometer aerosol particles in the tropical Atlantic Ocean: marine  
125 and biomass burning influences, *Journal of Atmospheric Chemistry*, 72, 105-125, 10.1007/s10874-  
126 015-9307-3, 2015.

127 van Pinxteren, M., Fomba, K. W., Triesch, N., Stolle, C., Wurl, O., Bahlmann, E., Gong, X. D.,  
128 Voigtlander, J., Wex, H., Robinson, T. B., Barthel, S., Zeppenfeld, S., Hoffmann, E. H., Roveretto, M., Li,  
129 C. L., Grosselin, B., Daele, V., Senf, F., van Pinxteren, D., Manzi, M., Zabalegui, N., Frka, S., Gasparovic,  
130 B., Pereira, R., Li, T., Wen, L., Li, J. R., Zhu, C., Chen, H., Chen, J. M., Fiedler, B., Von Tumpling, W.,  
131 Read, K. A., Punjabi, S., Lewis, A. C., Hopkins, J. R., Carpenter, L. J., Peeken, I., Rixen, T., Schulz-Bull,  
132 D., Monge, M. E., Mellouki, A., George, C., Stratmann, F., and Herrmann, H.: Marine organic matter in  
133 the remote environment of the Cape Verde islands - an introduction and overview to the  
134 MarParCloud campaign, *Atmospheric Chemistry and Physics*, 20, 6921-6951, 10.5194/acp-20-6921-  
135 2020, 2020.

136
